# Supplementary material for: Room-temperature synthesis of a cobalt 2,3,5,6-tetrafluoroterephthalic coordination polymer with enhanced capacity and cycling stability for lithium batteries
Source: Royal Society of Chemistry journal article supplement (doi:10.1039/c6nj03165j), 2017-01-01
Supplement: c6nj03165j1.pdf [file c6nj03165j1.pdf]

**Electronic supplementary information (ESI) for**

**Room-Temperature Synthesis of Cobalt 2,3,5,6-**

**Tetrafluoroterephthalic Coordination Polymer with**

**Enhanced Capacity and Cycling Stability for Lithium**

**Batteries**

Xiaobing Lou, Xiaoshi Hu, Chao Li, Yanqun Ning, Qun Chen, Ming Shen\* and Bingwen Hu\*

Shanghai Key Laboratory of Magnetic Resonance, School of Physics and Materials Science, East China Normal University,  
Shanghai 200062, China. E-mail: *mshen@phy.ecnu.edu.cn (M.S.); bwhu@phy.ecnu.edu.cn (B.H.)*.

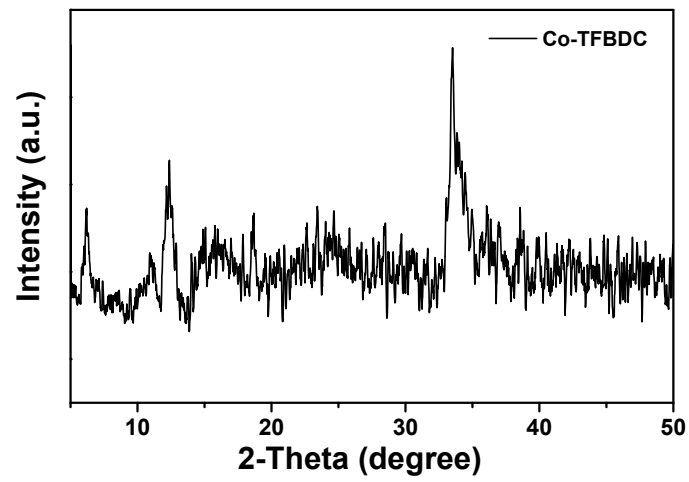

Fig. S1 XRD patterns of Co-TFBDC.

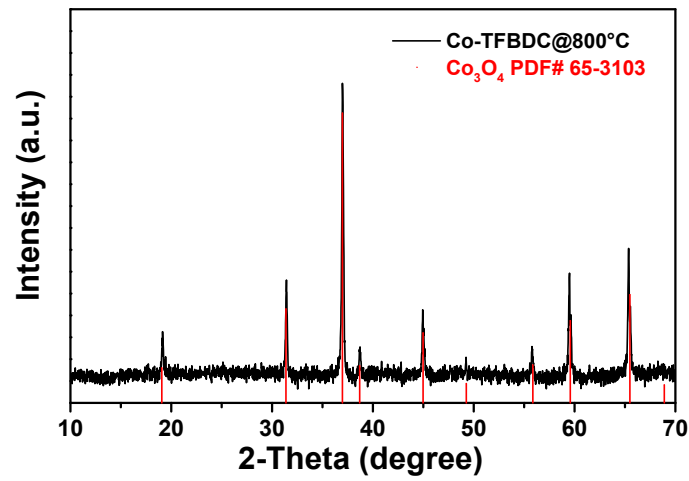

Fig. S2 XRD patterns of the annealed Co-TFBDC, which shows that the annealing product is Co<sub>3</sub>O<sub>4</sub>.

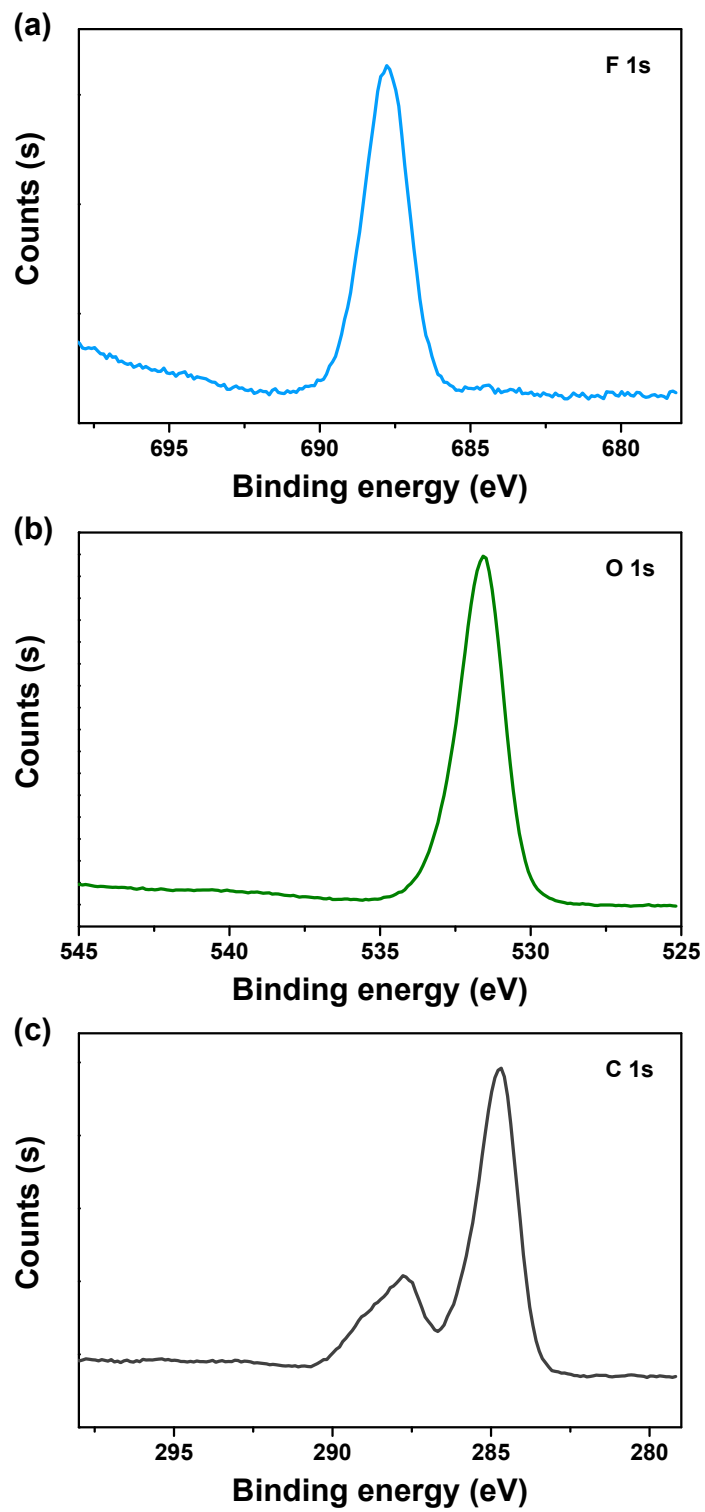

**Fig. S3** High-resolution (a) F 1s (b) O 1s (c) C 1s XPS spectra of Co-TFBDC.

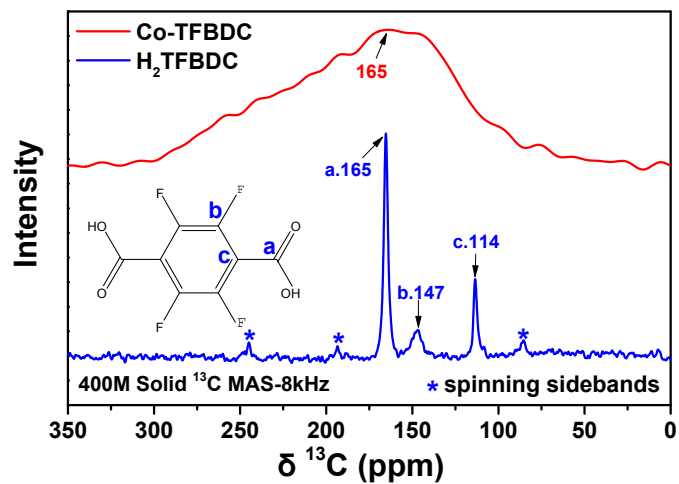

Fig. S4 Solid-state  $^{13}\text{C}$  NMR spectra of Co-TFBDC and  $\text{H}_2\text{TFBDC}$ .

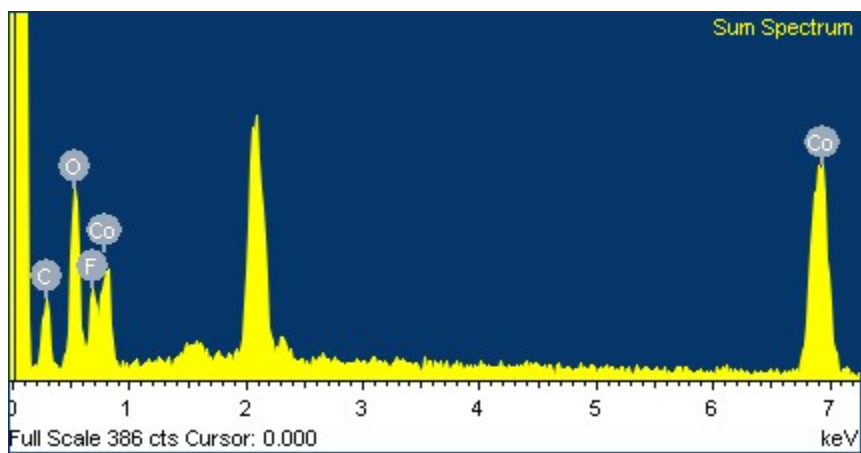

Fig. S5 Whole energy spectra of Co-TFBDC from the selected region. Before test, the samples were mounted on aluminum stubs, sputtered with gold resulting in the remaining peaks (e.g. approx. 2 keV) on the EDX spectrum.

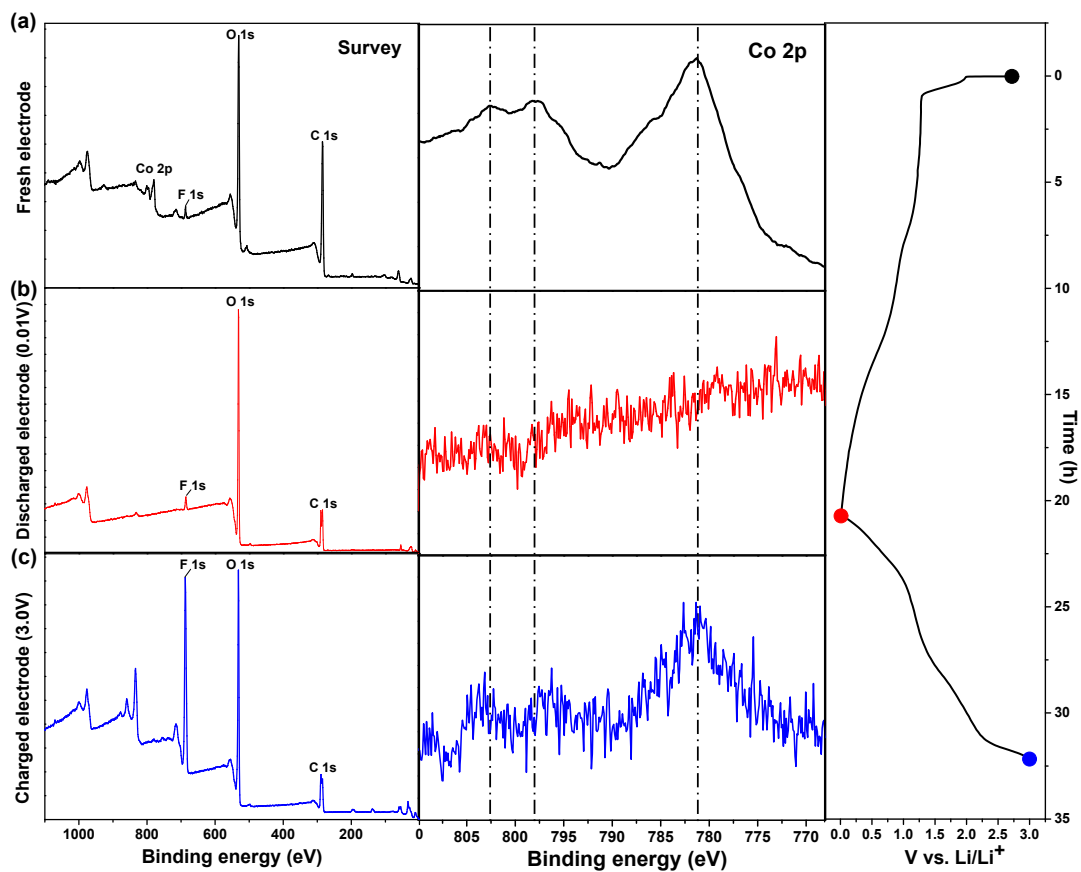

**Fig. S6** ex-situ XPS spectra of (a) fresh electrode, (b) discharged electrode (0.01V), and charged electrode (3.0V).

**Table S1** Atomic ratio of Co-TFBDC obtained from EDS analysis.

| Element | Weight% | Atom%  |
|---------|---------|--------|
| C       | 29.37   | 51.38  |
| O       | 19.73   | 25.92  |
| F       | 6.08    | 6.72   |
| Co      | 44.82   | 15.98  |
| Total   | 100.00  | 100.00 |
